# Supplementary material for: Investigation of Oral, Gastric, and Duodenal Microbiota in Patients with Upper Gastrointestinal Symptoms
Source: HighWire-hosted journal article supplement (doi:10.1136/jim-2020-001642), 2021-04-01

**Suppl. Figure 1. Mucosal sample obtention.** Brush samples at different levels of the upper GI tract were obtained during GERD.

**A**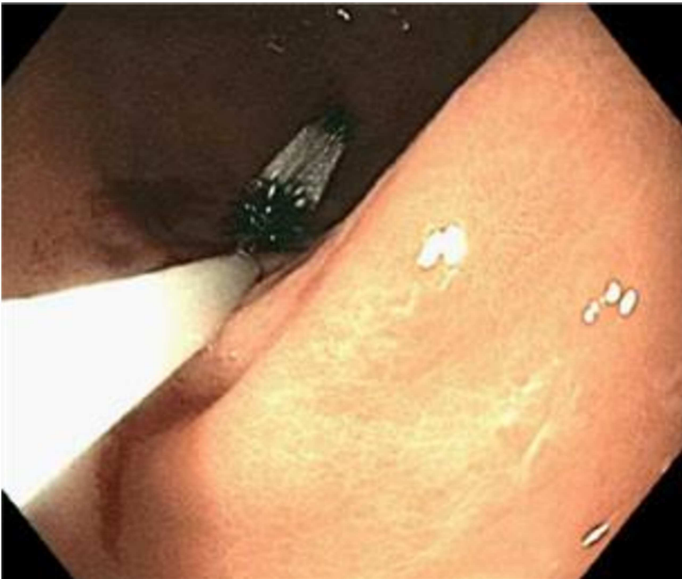**B**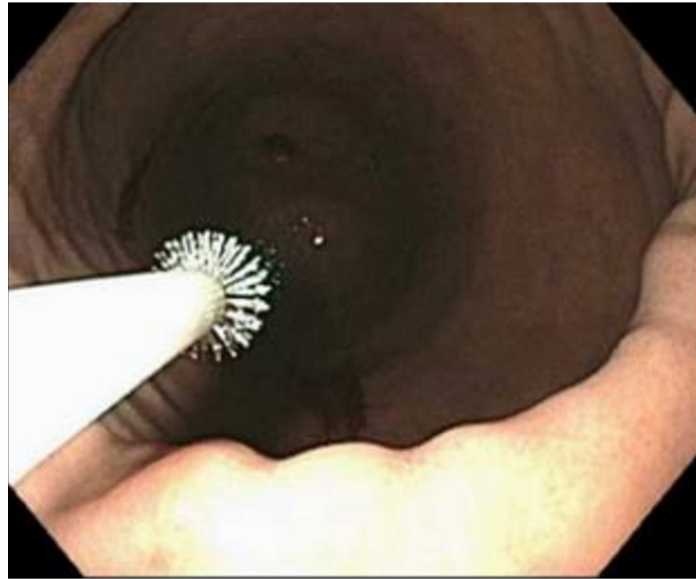**C**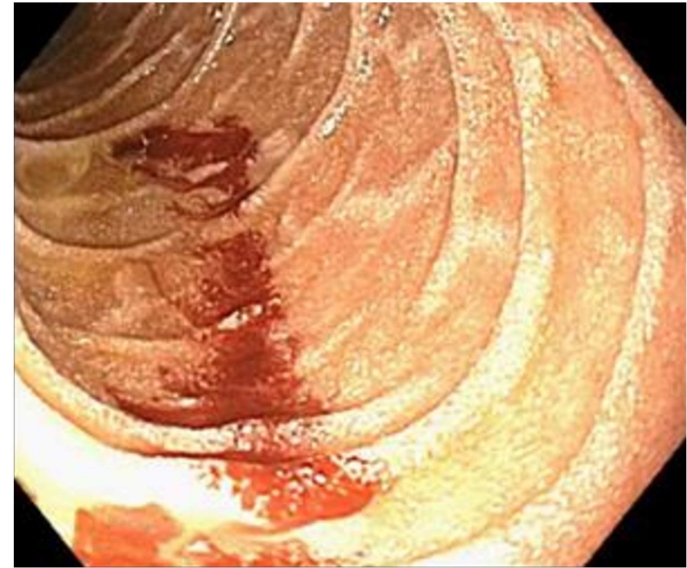

Supplement: jim-2020-001642supp001_data_supplement.pdf [file jim-2020-001642supp001_data_supplement.pdf]
