# Supplementary material for: Investigation of Oral, Gastric, and Duodenal Microbiota in Patients with Upper Gastrointestinal Symptoms
Source: HighWire-hosted journal article supplement (doi:10.1136/jim-2020-001642), 2021-04-01
Supplement: jim-2020-001642supp002_data_supplement.pdf [file jim-2020-001642supp002_data_supplement.pdf]

### Phyla and genera distribution.

**A**

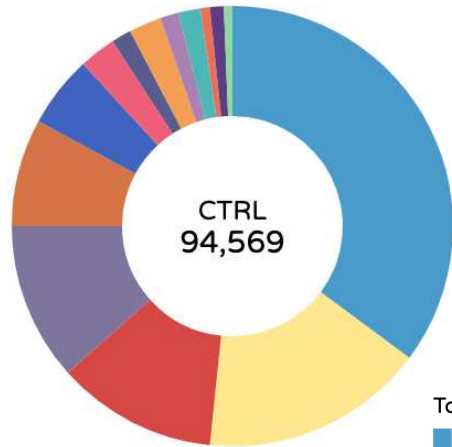

CTRL  
94,569

17 Taxonomy in Total

Top 10 Sequences

- k\_\_,Firmicutes,c\_\_,o\_\_,f\_\_,g\_\_,s\_\_
- k\_\_,Bacteroidetes,c\_\_,o\_\_,f\_\_,g\_\_,s\_\_
- k\_\_,Actinobacteria,c\_\_,o\_\_,f\_\_,g\_\_,s\_\_
- k\_\_,Proteobacteria,c\_\_,o\_\_,f\_\_,g\_\_,s\_\_
- k\_\_,Fusobacteria,c\_\_,o\_\_,f\_\_,g\_\_,s\_\_
- k\_\_,Synergistetes,c\_\_,o\_\_,f\_\_,g\_\_,s\_\_
- k\_\_,Candidatus\_Saccharibacteria,c\_\_,o\_\_,f\_\_,g\_\_,s\_\_
- k\_\_,Spirochaetes,c\_\_,o\_\_,f\_\_,g\_\_,s\_\_
- k\_\_,Acidobacteria,c\_\_,o\_\_,f\_\_,g\_\_,s\_\_
- k\_\_,Armatimonadetes,c\_\_,o\_\_,f\_\_,g\_\_,s\_\_

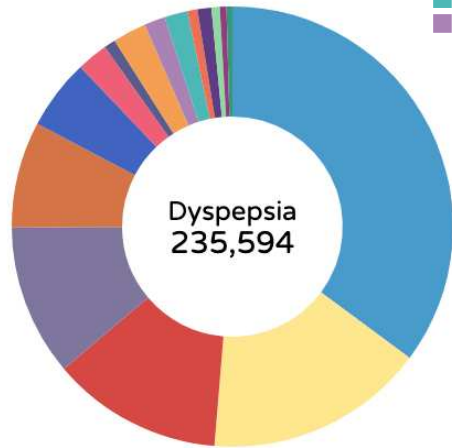

Dyspepsia  
235,594

17 Taxonomy in Total

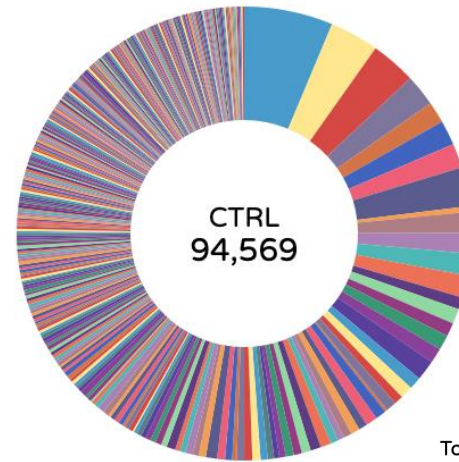

CTRL  
94,569

384 Taxonomy in Total

Top 10 Sequences

- k\_\_,Firmicutes,Negativicutes,Selenomonadales,Veillonellaceae,Veillonella,s\_\_
- k\_\_,Firmicutes,Bacilli,Lactobacillales,Streptococcaceae,Streptococcus,s\_\_
- k\_\_,Bacteroidetes,Bacteroidia,Bacteroidales,Prevotellaceae,Prevotella,s\_\_
- k\_\_,Actinobacteria,Actinobacteria,Actinomycetales,Micrococccaceae,Rothia,s\_\_
- k\_\_,Firmicutes,Negativicutes,Selenomonadales,Veillonellaceae,Selenomonas,s\_\_
- k\_\_,Proteobacteria,Gammaproteobacteria,Pasteurellales,Pasteurellaceae,Haemophilus,s\_\_
- k\_\_,Firmicutes,Negativicutes,Selenomonadales,Veillonellaceae,Megasphaera,s\_\_
- k\_\_,Fusobacteria,Fusobacteriia,Fusobacteriales,Fusobacteriaceae,Fusobacterium,s\_\_
- k\_\_,Proteobacteria,Betaproteobacteria,Neisseriales,Neisseriaceae,Neisseria,s\_\_
- k\_\_,Firmicutes,Bacilli,Bacillales,Bacillales\_Incertae\_Sedis\_XI,Gemella,s\_\_

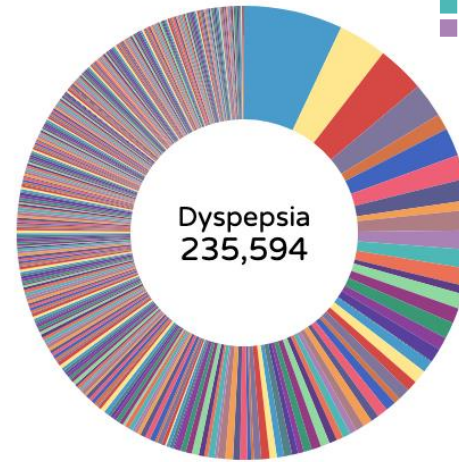

Dyspepsia  
235,594

384 Taxonomy in Total

Saliva

Pinch donut partition

**B**

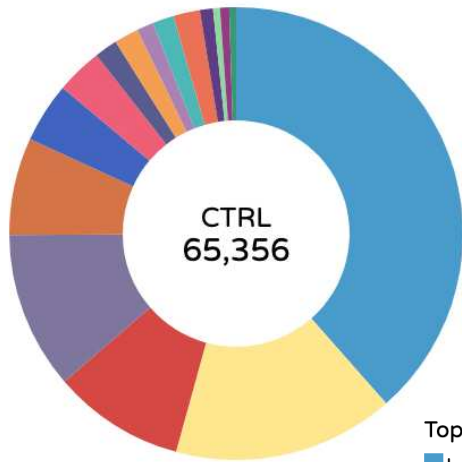

Top 10 Sequences

- k\_\_Firmicutes,c\_\_o\_\_f\_\_g\_\_s\_\_
- k\_\_Bacteroidetes,c\_\_o\_\_f\_\_g\_\_s\_\_
- k\_\_Proteobacteria,c\_\_o\_\_f\_\_g\_\_s\_\_
- k\_\_Actinobacteria,c\_\_o\_\_f\_\_g\_\_s\_\_
- k\_\_Fusobacteria,c\_\_o\_\_f\_\_g\_\_s\_\_
- k\_\_Synergistetes,c\_\_o\_\_f\_\_g\_\_s\_\_
- k\_\_Spirochaetes,c\_\_o\_\_f\_\_g\_\_s\_\_
- k\_\_Verrucomicrobia,c\_\_o\_\_f\_\_g\_\_s\_\_
- k\_\_Candidatus\_Saccharibacteria,c\_\_o\_\_f\_\_g\_\_s\_\_
- k\_\_Acidobacteria,c\_\_o\_\_f\_\_g\_\_s\_\_

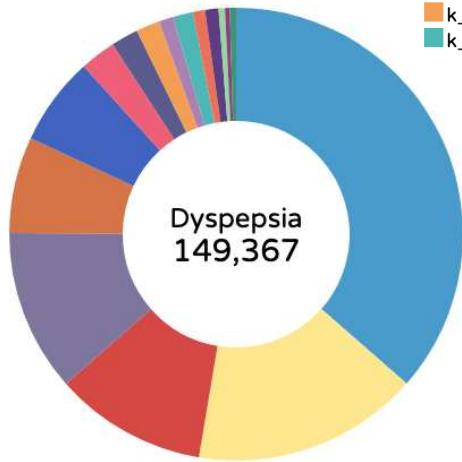

Gastric

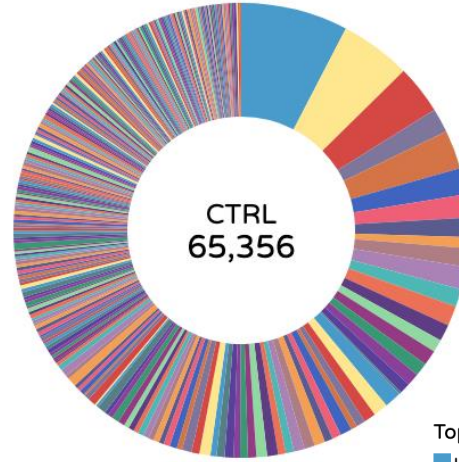

Top 10 Sequences

- k\_\_Firmicutes,Negativicutes,Selenomonadales,Veillonellaceae,Veillonella,s\_\_
- k\_\_Firmicutes,Bacilli,Lactobacillales,Streptococcaceae,Streptococcus,s\_\_
- k\_\_Bacteroidetes,Bacteroidia,Bacteroidales,Prevotellaceae,Prevotella,s\_\_
- k\_\_Actinobacteria,Actinobacteria,Actinomycetales,Micrococcaceae,Rothia,s\_\_
- k\_\_Proteobacteria,Gammaproteobacteria,Pasteurellales,Pasteurellaceae,Haemophilus,s\_\_
- k\_\_Firmicutes,Bacilli,Lactobacillales,Lactobacillaceae,Lactobacillus,s\_\_
- k\_\_Firmicutes,Negativicutes,Selenomonadales,Veillonellaceae,Megasphaera,s\_\_
- k\_\_Proteobacteria,Betaproteobacteria,Neisseriales,Neisseriaceae,Neisseria,s\_\_
- k\_\_Firmicutes,Bacilli,Bacillales,Bacillales\_Incertae\_Sedis\_XI,Gemella,s\_\_
- k\_\_Firmicutes,Negativicutes,Selenomonadales,Veillonellaceae,Selenomonas,s\_\_

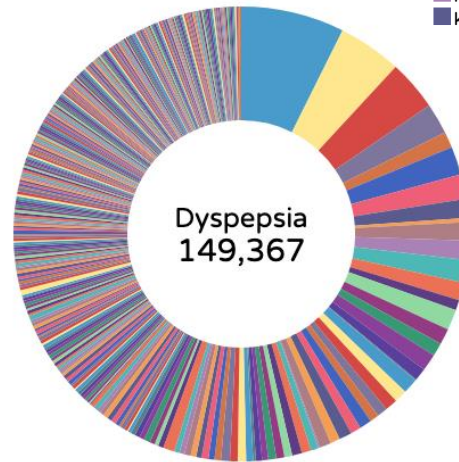

Pinch donut partition

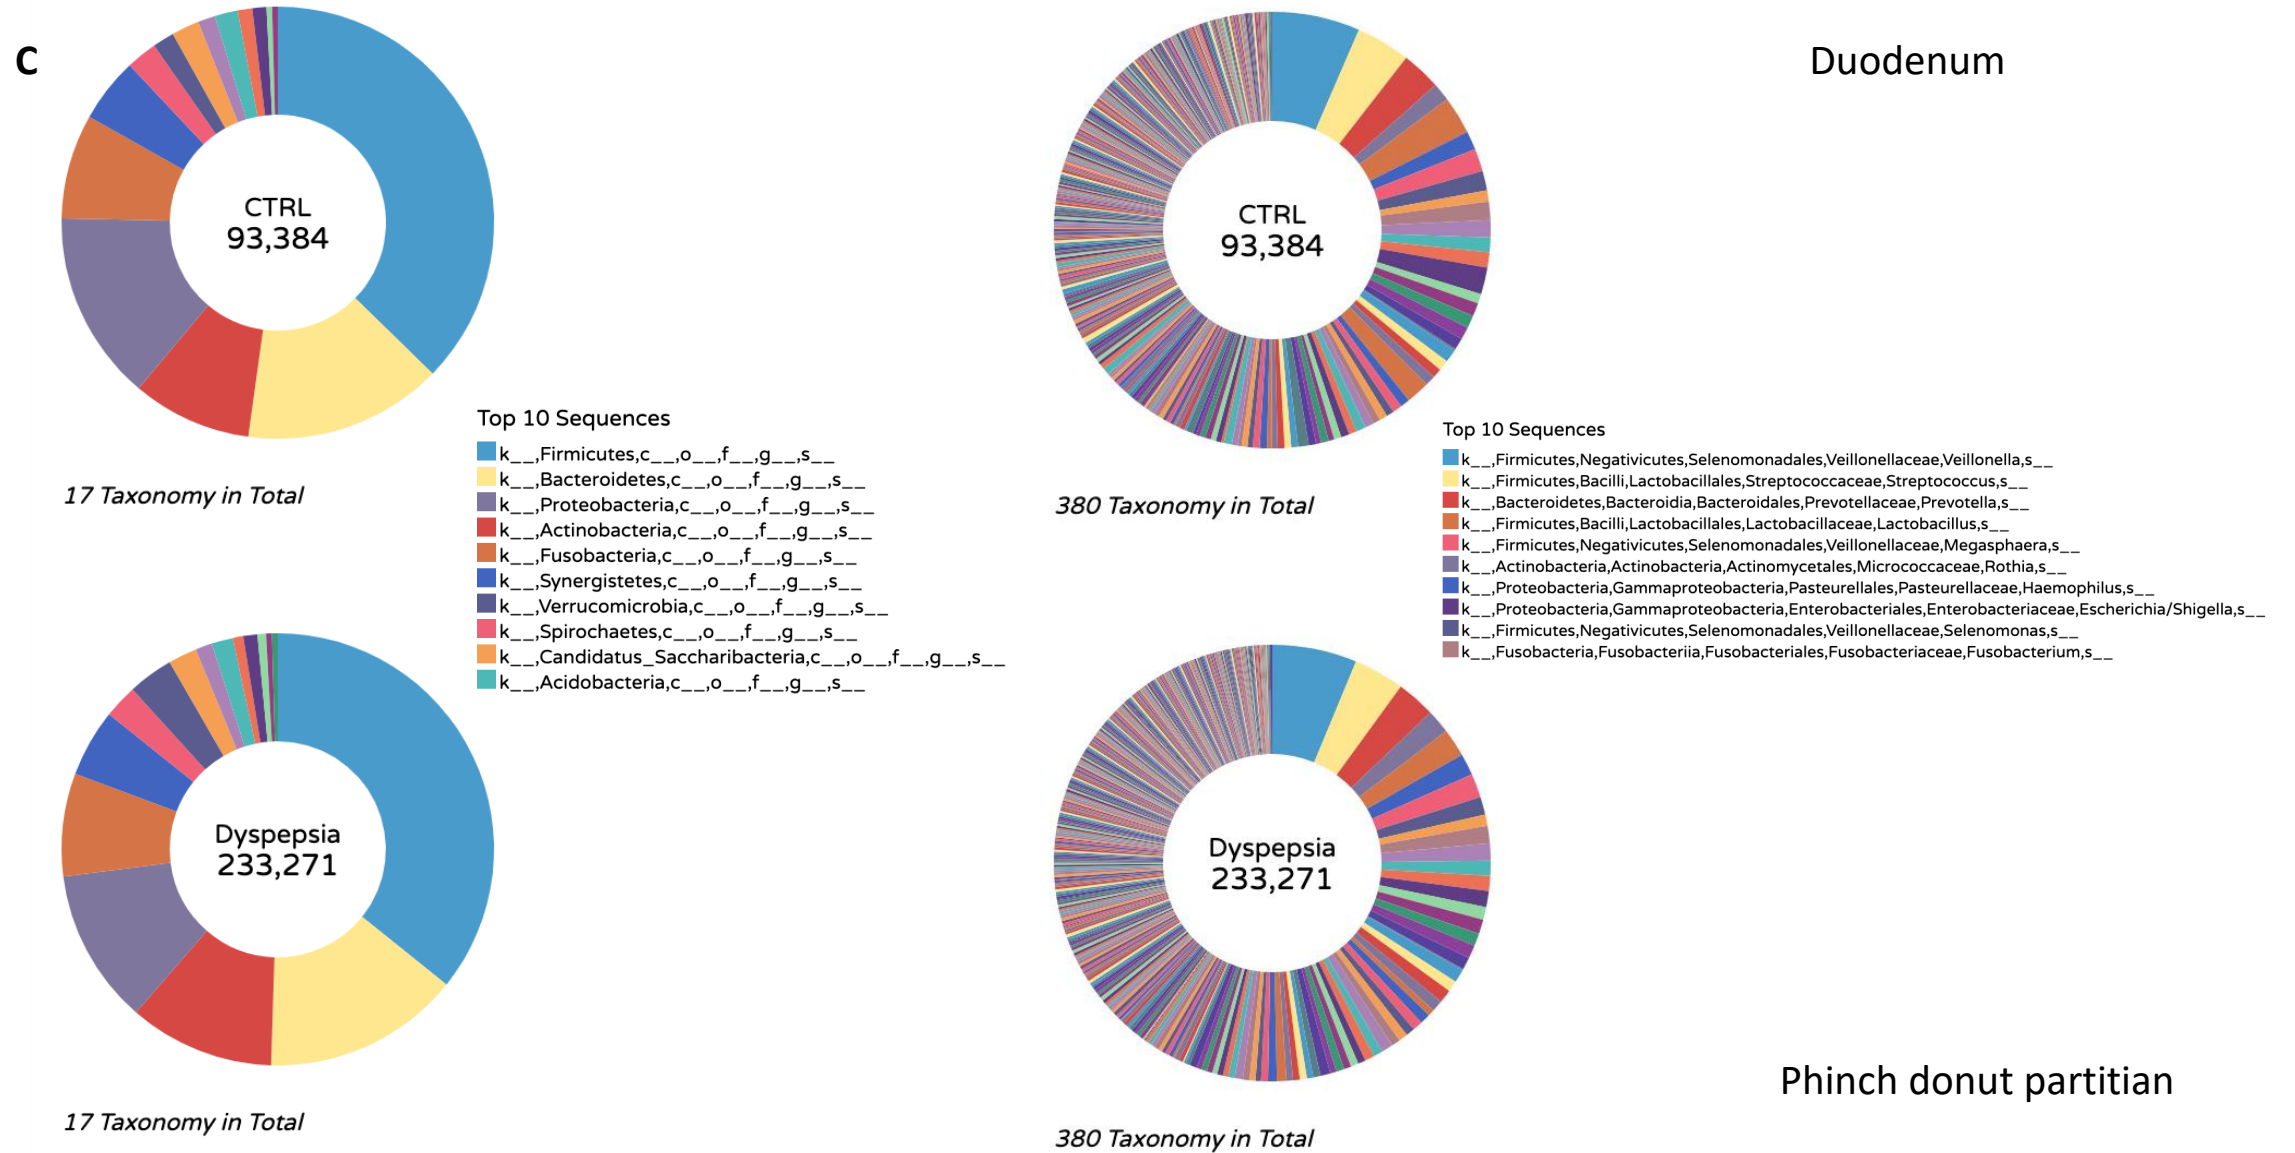

**Suppl. Figure 2. Phyla and genera distribution.** Distribution of most abundant phyla (left) and genera (right) between dyspepsia cases (lower row charts) and achalasia controls (upper row charts) in A saliva, B gastric mucosa, and C duodenum.
